# Supplementary material
Source: publisher figshare collection journal article supplement (https://tandf.figshare.com/ndownloader/files/13775507)
Supplement: Supplementary file 1 [file 13775507]

Supplemental Material. Post-hoc comparisons of emotion recognition scores at each intensity level for each emotion type tested.

| **Intensity Comparison** | **Wilcoxon *Z*, *p*-value** |
| --- | --- |
| **Anger** | |
| 40% vs. 60% | *Z* = -3.03, *p* = .002 |
| 40% vs. 80% | *Z* = -3.31, *p* = .001 |
| 40% vs. 100% | *Z* = -3.22, *p* = .001 |
| 60% vs. 80% | *Z* = -0.53, *p* = .60 |
| 60% vs. 100% | *Z* = -0.44, *p* = .66 |
| 80% vs. 100% | *Z* = -0.45, *p* = .65 |
| **Disgust** | |
| 40% vs. 60% | *Z* = -3.00, *p* = .003 |
| 40% vs. 80% | *Z* = -4.36, *p* < .001 |
| 40% vs. 100% | *Z* = -3.29, *p* = .001 |
| 60% vs. 80% | *Z* = -2.56, *p* = .01 |
| 60% vs. 100% | *Z* = -0.78, *p* = .44 |
| 80% vs. 100% | *Z* = -1.84, *p* = .07 |
| **Happiness** | |
| 40% vs. 60% | *Z* = -4.44, *p* < .001 |
| 40% vs. 80% | *Z* = -4.72, *p* < .001 |
| 40% vs. 100% | *Z* = -4.77, *p* < .001 |
| 60% vs. 80% | *Z* = -1.34, *p* = .18 |
| 60% vs. 100% | *Z* = -0.82, *p* = .41 |
| 80% vs. 100% | *Z* = -0.58, *p* = .56 |
| **Sadness** | |
| 40% vs. 60% | *Z* = -3.30, *p* = .001 |
| 40% vs. 80% | *Z* = -4.91, *p* < .001 |
| 40% vs. 100% | *Z* = -4.93, *p* < .001 |
| 60% vs. 80% | *Z* = -3.13, *p* = .002 |
| 60% vs. 100% | *Z* = -3.25, *p* = .001 |
| 80% vs. 100% | *Z* = -0.32 , *p* = .75 |
| **Fear** | |
| 40% vs. 60% | *Z* = -0.45, *p* = .65 |
| 40% vs. 80% | *Z* = -1.70, *p* = .09 |
| 40% vs. 100% | *Z* = -3.11, *p* = .002 |
| 60% vs. 80% | *Z* = -3.02, *p* = .003 |
| 60% vs. 100% | *Z* = -3.61, *p* < .001 |
| 80% vs. 100% | *Z* = -1.69, *p* = .09 |
| **Surprise** | |
| 40% vs. 60% | *Z* = -2.38, *p* = .02 |
| 40% vs. 80% | *Z* = -3.37, *p* = .001 |
| 40% vs. 100% | *Z* = -3.66, *p* < .001 |
| 60% vs. 80% | *Z* = - 1.50, *p* = .13 |
| 60% vs. 100% | *Z* = -1.55 , *p* = .12 |
| 80% vs. 100% | *Z* = -0.27, *p* = .79 |
